# Supplementary material for: Dependence of copper particle size and interface on methanol and CO formation in CO2 hydrogenation over Cu@ZnO catalysts
Source: Royal Society of Chemistry journal article supplement (doi:10.1039/d1cy01836a), 2021-11-29
Supplement: d1cy01836a1.pdf [file d1cy01836a1.pdf]

## Supporting information

### **Dependence of copper particles size and interface on the methanol and CO formation in CO<sub>2</sub> hydrogenation over Cu@ZnO catalysts**

Feng Jiang, Yu Yang, Li Wang, Yufeng Li, Zhihao Fang, Yuebing Xu, Bing Liu, Xiaohao Liu\*

*Department of Chemical Engineering, School of Chemical and Material Engineering, Jiangnan University, Wuxi 214122, China*

\*Corresponding author, E-mail address: [liuxh@jiangnan.edu.cn](mailto:liuxh@jiangnan.edu.cn) (X.H. Liu)

## 1. Supplementary figures:

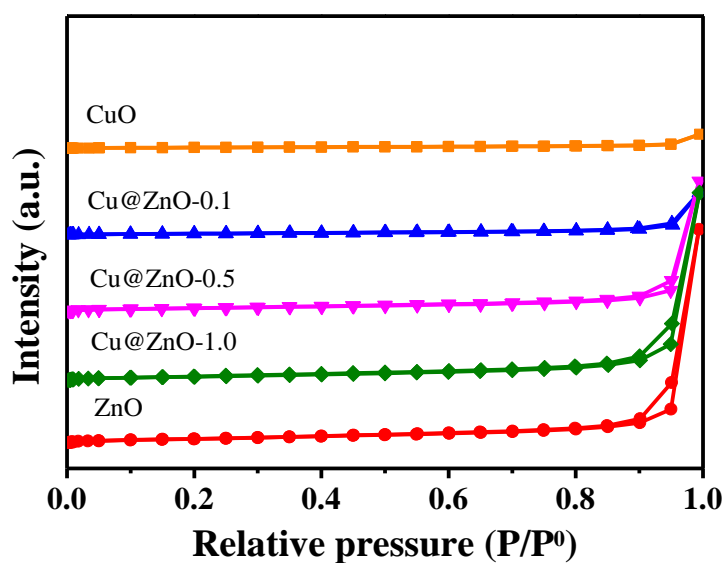

**Fig. S1** The N<sub>2</sub> adsorption-desorption isotherms of CuO@ZnO catalysts.

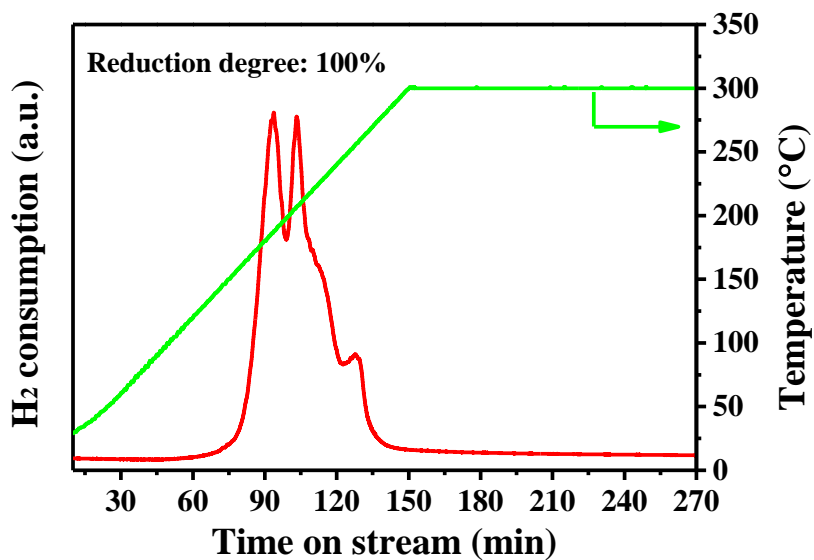

**Fig. S2** H<sub>2</sub>-TPR profiles of pure CuO under the real reduction conditions of 300 °C, 2 h and a rate of 2 °C min<sup>-1</sup>.

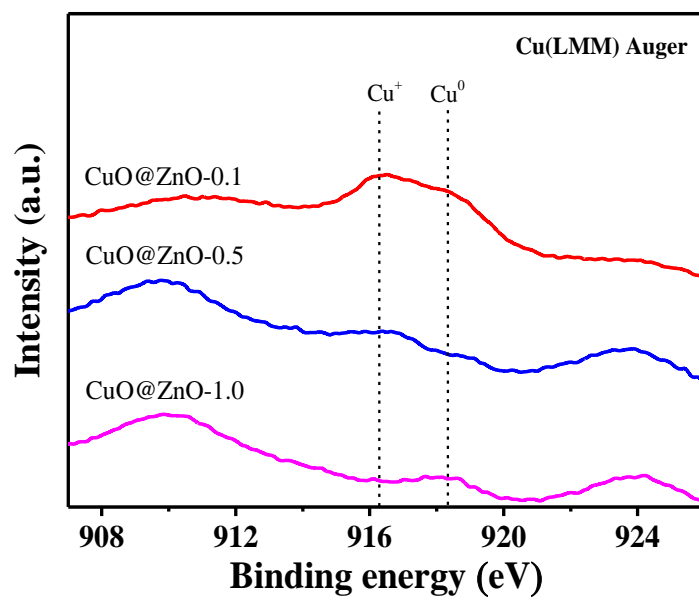

**Fig. S3** Cu LMM Auger spectra of the reduced CuO@ZnO catalysts

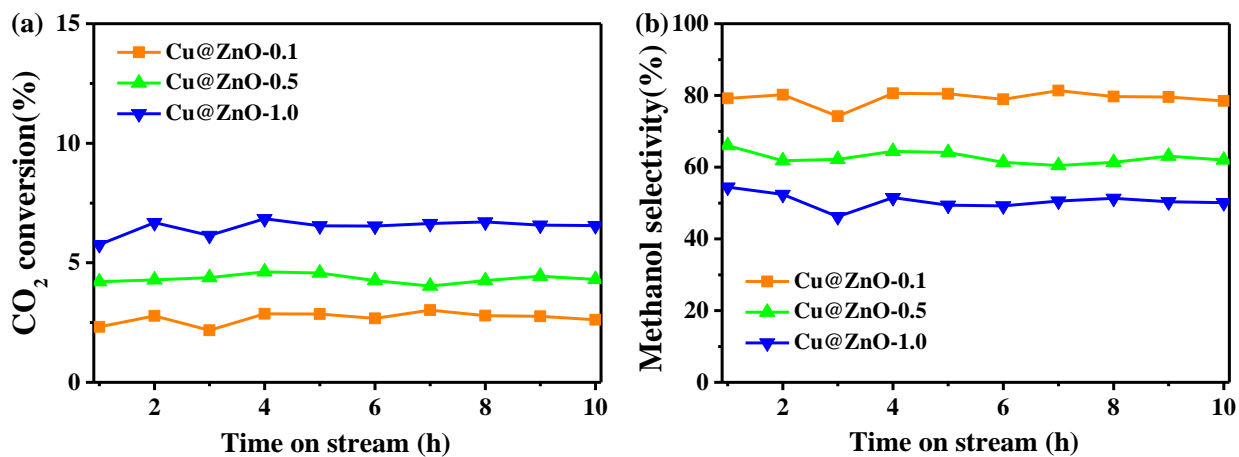

**Fig. S4** Time on stream of evolution of CO<sub>2</sub> conversion (a) and product selectivity (b) over various Cu@ZnO catalysts. Reaction conditions: catalyst = 0.3 g, H<sub>2</sub>/CO<sub>2</sub> = 3, GHSV = 12000 mL g<sub>cat</sub><sup>-1</sup> h<sup>-1</sup>, 3 MPa, 10 h, 240 °C.

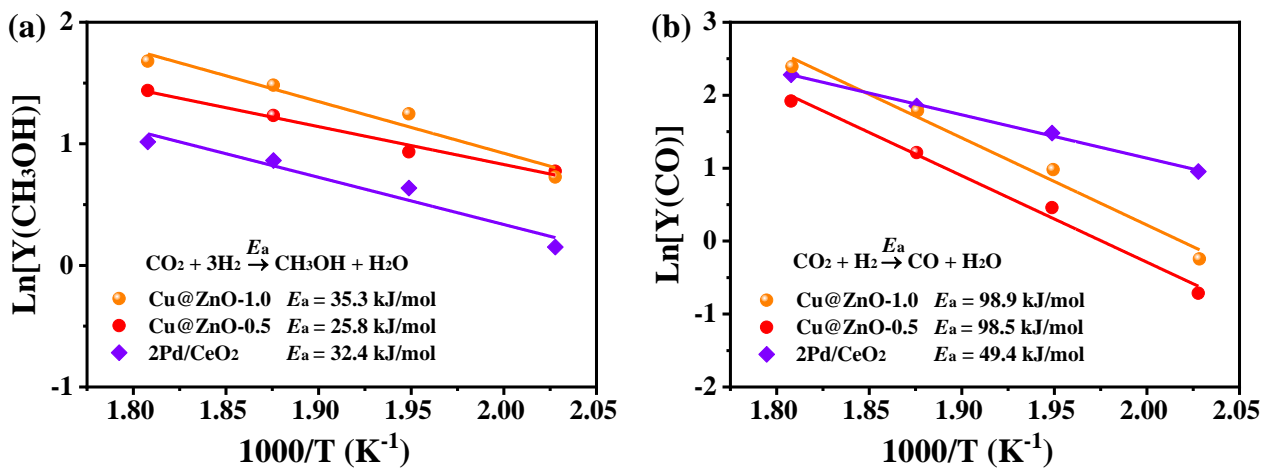

**Fig. S5** Arrhenius plots for (a) methanol synthesis, and (b) RWGS reaction between 220 and 280 °C for the calculations of apparent activation energy ( $E_a$ ) for Cu@ZnO and Pd/CeO<sub>2</sub> catalysts.

## 2. Supplementary tables:

**Table S1** The compositions of Cu@ZnO catalysts measured by ICP.

| Catalyst   | Cu (wt. %) | Zn (wt. %) | Zn/Cu |
|------------|------------|------------|-------|
| Cu@ZnO-0.1 | 69.7       | 8.1        | 0.11  |
| Cu@ZnO-0.5 | 46.8       | 26.8       | 0.56  |
| Cu@ZnO-1.0 | 35.4       | 35.9       | 1.11  |

**Table S2** Summary of the Cu-ZnO based catalysts for the hydrogenation of CO<sub>2</sub> to methanol

| Catalyst              | Preparation                        | H <sub>2</sub> /CO ratio | T <sub>R</sub> (°C) | P <sub>R</sub> (MPa) | Space velocity <sup>a</sup> | Conv. (%) | Sel. (%) | CH <sub>3</sub> OH rate<br>(mg g <sub>cat</sub> <sup>-1</sup> h <sup>-1</sup> ) | Reference |
|-----------------------|------------------------------------|--------------------------|---------------------|----------------------|-----------------------------|-----------|----------|---------------------------------------------------------------------------------|-----------|
| Cu@ZnO-1.0            | Deposition precipitation           | 3:1                      | 240                 | 3.0                  | (W) 36000                   | 3.7       | 72.6     | 335.7                                                                           | This work |
| Cu-ZnO                | Oxalate coprecipitation            | 3:1                      | 240                 | 3.0                  | (W) 2400                    | 16.1      | 36.5     | 44.3                                                                            | 1         |
| Cu(1)ZnO              | Wet impregnation                   | 9:1                      | 180                 | 0.7                  | (W) 4000                    | --        | --       | 1.1                                                                             | 2         |
| Cu(8)ZnO              | Wet impregnation                   | 9:1                      | 180                 | 0.7                  | (W) 4000                    | --        | --       | 2.8                                                                             | 2         |
| Cu(15)ZnO             | Wet impregnation                   | 9:1                      | 180                 | 0.7                  | (W) 4000                    | --        | --       | 3.4                                                                             | 2         |
| Cu-ZnO                | Carbonate coprecipitation          | 3:1                      | 240                 | 3.0                  | (W) 12096                   | 10.6      | 54.1     | 240                                                                             | 3         |
| Cu-ZnO-rod            | Stepwise precipitation             | 3:1                      | 240                 | 3.0                  | (W) 12096                   | 8.0       | 61.8     | 210                                                                             | 3         |
| Cu-ZnO-filament       | Stepwise precipitation             | 3:1                      | 240                 | 3.0                  | (W) 12096                   | 16.5      | 78.2     | 550                                                                             | 3         |
| 5%Cu/plate ZnO        | Impregnation                       | 3:1                      | 280                 | 3.0                  | (W) 3600                    | 9.8       | 43.4     | 50.9                                                                            | 4         |
| Cu-ZnO                | Coprecipitation                    | 9:1                      | 167                 | 0.1                  | (W)12000                    | --        | 56.6     | 8.8                                                                             | 5         |
| Cu-ZnO                | Coprecipitation                    | 3:1                      | 250                 | 3.0                  | (G)18000                    | 4.0       | --       | 64.0                                                                            | 6         |
| CuZn@ZnO <sub>x</sub> | Surface modification precipitation | 3:1                      | 250                 | 3.0                  | (G)18000                    | 0.3       | --       | 19.2                                                                            | 7         |
| Cu@ZnO <sub>x</sub>   | Surface modification precipitation | 3:1                      | 250                 | 3.0                  | (G)18000                    | 2.3       | --       | 147.2                                                                           | 7         |
| Cu-ZnO                | Coprecipitation                    | 3:1                      | 250                 | 3.0                  | (G)18000                    | 10.7      | --       | 51.2                                                                            | 7         |

<sup>a</sup> (W) = volume flow rate/catalyst mass, mL g<sub>cat</sub><sup>-1</sup> h<sup>-1</sup>, (G) = volume flow rate/bed volume, h<sup>-1</sup>

## References

1. Xiao, J.; Mao, D.; Guo, X.; Yu, J. Effect of TiO<sub>2</sub>, ZrO<sub>2</sub>, and TiO<sub>2</sub>-ZrO<sub>2</sub> on the Performance of CuO-ZnO Catalyst for CO<sub>2</sub> Hydrogenation to Methanol. *Appl. Surf. Sci.* **2015**, *338*, 146-153.
2. Karelavic, A.; Ruiz, P. The Role of Copper Particle Size in Low Pressure Methanol Synthesis via CO<sub>2</sub> Hydrogenation over Cu/ZnO Catalysts. *Catal. Sci. Technol.* **2015**, *5* (2), 869-881.
3. Lei, H.; Nie, R.; Wu, G.; Hou, Z. Hydrogenation of CO<sub>2</sub> to CH<sub>3</sub>OH over Cu/ZnO Catalysts with Different ZnO Morphology. *Fuel* **2015**, *154*, 161-166.
4. Sun, Y.; Huang, C.; Chen, L.; Zhang, Y.; Fu, M.; Wu, J.; Ye, D. Active Site Structure Study of Cu/Plate ZnO Model Catalysts for CO<sub>2</sub> Hydrogenation to Methanol under the Real Reaction Conditions. *J. CO<sub>2</sub> Util.* **2020**, *37*, 55-64.
5. Fujita, S.; Moribe, S.; Kanamori, Y.; Kakudate, M.; Takezawa, N., Preparation of a Coprecipitated Cu/ZnO Catalyst for the Methanol Synthesis from CO<sub>2</sub>-Effects of the Calcination and Reduction Conditions on the Catalytic Performance. *Appl. Catal., A* **2001**, *207* (1-2), 121-128.
6. Tisseraud, C.; Comminges, C.; Belin, T.; Ahouari, H.; Soualah, A.; Pouilloux, Y.; Le Valant, A. The Cu-ZnO Synergy in Methanol Synthesis from CO<sub>2</sub>, Part 2: Origin of the Methanol and CO Selectivities Explained by Experimental Studies and a Sphere Contact Quantification Model in Randomly Packed Binary Mixtures on Cu-ZnO Coprecipitate Catalysts. *J. Catal.* **2015**, *330*, 533-544.
7. Le Valant, A.; Comminges, C.; Tisseraud, C.; Canaff, C.; Pinard, L.; Pouilloux, Y. The Cu-ZnO Synergy in Methanol Synthesis from CO<sub>2</sub>, Part 1: Origin of Active Site Explained by Experimental Studies and a Sphere Contact Quantification Model on Cu +ZnO Mechanical Mixtures. *J. Catal.* **2015**, *324*, 41-49.
